# Supplementary material
Source: publisher site journal article supplement (https://www.dovepress.com/article/366480)
Supplement: Supplementary file 1 [file get_supplementary_file.php]

**Supplementary Table S1 Primers for seven Housekeeping genes**

| **Primers** | **Primer sequences 5’-3’** | **Length(bp)** | **The annealing temperature** |
| --- | --- | --- | --- |
| **gapA** | **F:TGAAATATGACTCCACTCACGG**  **R:CTTCAGAAGCGGCTTTGATGGCTT** | **450** | **60℃** |
| **infB** | **F:CTCGCTGCTGGACTATATTCG**  **R:CGCTTTCAGCTCAAGAACTTC**  **2F:ACTAAGGTTGCCTCCGGCGAAGC** | **318** | **50℃** |
| **mdh** | **F:CCCAACTCGCTTCAGGTTCAG**  **R:CCGTTTTTCCCCAGCAGCAG** | **477** | **58℃** |
| **pgi** | **F:GAGAAAAACCTGCCTGTACTGCTGGC**  **R:CGCGCCACGCTTTATAGCGGTTAAT**  **2F:CTGCTGGCGCTGATCGGCAT**  **2R:TTATAGCGGTTAATCAGGCCGT** | **432** | **50℃** |
| **phoE** | **F:ACCTACCGCAACACCGACTTCTTCGG**  **R:TGATCAGAACTGGTAGGTGAT** | **420** | **50℃** |
| **rpoB** | **F:GGCGAAATGGCWGAGAACCA**  **R:GAGTCTTCGAAGTTGTAACC** | **501** | **58℃** |
| **tonB** | **F:CTTTATACCTCGGTACATCAGGTT**  **R:ATTCGCCGGCTGRGCRGAGAG** | **414** | **50℃** |

**Supplementary Table S2 The Presence of Resistance Genome in three isolates by WGS**

| **Isolates** | **Antibiotics** | **Resistance genes** |
| --- | --- | --- |
| Strain 1 | β-Lactam  Sulfonamide  Fluoroquinolone  Aminoglycoside  Tetracycline | NDM-1; NDM-4; NDM-5; NDM-9  KPC-2; KPC-3  CTX-M-1; CTX-M-2; CTX-M-8; CTX-M-9; CTX-M-25; CTX-M-65  TEM-1; TEM-2; TEM-3  SHV-1; SHV-2; SHV-5; SHV-8; SHV-12; SHV-38  LEN  OXY  SME  CARB  sul1; sul2; sul3  qnrS8; qnrS9; qnrB1; qnrB31; qnrB42; qnrA1  APH (6)-Id; APH (3'')-Ia; APH (3'')-Ib; APH (3'')-Ic; AAC (3)-IIa; aadA16; aadA6  tetR; tetA; tetB; tet31 |
| Strain 2 | β-Lactam  Fluoroquinolone  Aminoglycoside  Tetracycline | KPC-2; KPC-3  CTX-M-1; CTX-M-2; CTX-M-8; CTX-M-9; CTX-M-25; CTX-M-65  SHV-1; SHV-2; SHV-5; SHV-8; SHV-12; SHV-38  TEM-1; TEM-2; TEM-3  LEN  OXY  SME  IMI  CARB  LRA  norB  acrD  tetD |
| Strain 3 | β-Lactam  Sulfonamide  Aminoglycoside  Tetracycline | OXA-23-like(OXA-23、OXA-27、OXA-49, OXA-133, OXA-134)  OXA-24-like(OXA-24、OXA-25、OXA-26、OXA-72)  OXA-51-like(OXA-51、OXA-64~OXA-71、OXA-75~80 OXA-82~84, OXA-86~95, OXA-98~100,OXA-104,OXA-106~113,OXA-115~117,OXA-120,OXA-121,OXA-128,  OXA-130~132, OXA-138, OXA-144, OXA-148~150, OXA-172~180, OXA-194~197, OXA-200~203, OXA-206, OXA-208, OXA-216, OXA-217, OXA-219, OXA-223, OXA-241, OXA-242, OXA-248~250, OXA-254)  OXA-58-like(OXA-58、OXA-97,OXA-164)  CMY  sul1; sul2; sul3  aadA; APH (6)-Id; APH (3')-Ia; APH (3')-Ib; AAC (6')-Ib  tetR; tetA; tetB; tet31 |

**Supplementary Table S3 The Presence of Virulence Genome in three isolates by WGS**

| **Isolates** | **classes** | **Virulence factors** |
| --- | --- | --- |
| Strain 1 | Siderophores  Capsule  Fimbriae  LPS  Iron (III) ABC transporter  OMPs | ent; fep; ybt; irp1; iroN; iutA  wcb; wzt2; bex; cps; gmhA; cap;ctrD;ureA  pil; agg; aaf;chpD  waa;rfb;wzt;bpl;gluE; galE; manB  fbpB; fbpC; hitC  ompA; ompP5; ompU |
| Strain 2 | Siderophores  Capsule  Fimbriae  LPS  Iron (III) ABC transporter  OMPs | ent; fep; ybt; irp1; fyuA; iroN; iutA;  wcb; wzt2; gmpA; bex; cap; cps;ctrD;ureA  fim; sfa;pil; pap;chpD;foc  waa; wzt; bpl;gluE;galE;manB  fbpB; fbpC; hitC  ompA; ompP5; ompU |
| Strain 3 | Siderophores  Capsule  Fimbriae  LPS  Iron (III) ABC transporter  OMPs | ent; fep; ybt; irp1; fyuA; iroN; iutA; iuc  cps; wzt2; wcb; cap;bex;ctrD;ureA  fim;sfa;pap;pil;chpD;hif  waa;bpl; gluE;galE;manB  fbpC; hitC  ompA |
